# Supplementary material
Source: PubMed Central journal article supplement (PMC4597990)

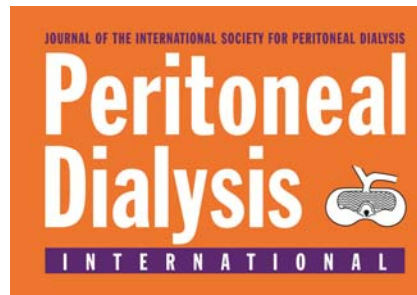

## Supplemental Materials for

# The Effect of Glycated Hemoglobin and Albumin-corrected Glycated Serum Protein on Mortality in Diabetic Patients Receiving Continuous Peritoneal Dialysis

Fenfen Peng\*, Xi Xia\*, Feng He, Zhijian Li, Fengxian Huang, Xueqing Yu

Supplemental Table 1. Demographic, clinical, and laboratory characteristics in diabetic PD patients with and without HbA1c or GSP.

| Variables                   | Diabetic patients with   | Diabetic patients                 | P Value |
|-----------------------------|--------------------------|-----------------------------------|---------|
|                             | HbA1c and GSP<br>n = 200 | without HbA1c or<br>GSP<br>n = 45 |         |
| Age (years)                 | 60.3 ± 10.6              | 61.8 ± 11.8                       | 0.40    |
| Male, n (%)                 | 119 (60%)                | 23 (51%)                          | 0.34    |
| Follow-up duration (months) | 29.0 ± 15.6              | 27.4 ± 15.5                       | 0.82    |
| BMI (kg/m <sup>2</sup> )    | 22.5 ± 2.8               | 20.4 ± 6.5                        | 0.27    |
| CVD, n (%)                  | 81 (35%)                 | 15 (33%)                          | 0.24    |

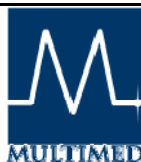

|                               |                  |                   |      |
|-------------------------------|------------------|-------------------|------|
| Hypertension, n (%)           | 153 (77%)        | 33 (73%)          | 0.28 |
| Methods of glycemetic control |                  |                   | 0.79 |
| Usage of Insulin              | 181 (90%)        | 41 (91%)          |      |
| Oral glucose control agents   | 3 (2%)           | 1(2%)             |      |
| Combined                      | 16 (8%)          | 3 (7%)            |      |
| Usage of EPO, n, %            | 191 (96%)        | 42 (93%)          | 0.77 |
| Hemoglobin (g/L)              | 101.0 ± 13.7     | 98.0 ± 16.7       | 0.69 |
| Glucose (mg/dl)               | 7.48 ± 2.35      | 7.22 ± 1.81       | 0.87 |
| Albumin (g/L)                 | 34.9 ± 3.5       | 33.7 ± 3.5        | 0.38 |
| Phosphorus (mmol/L)           | 1.59 ± 0.71      | 1.44 ± 0.48       | 0.41 |
| HsCRP <sup>a</sup> (mg/L)     | 5.34 (2.24-9.96) | 4.75 (1.15-10.11) | 0.39 |
| Total triglycerides (mmol/L)  | 2.16 ± 1.41      | 1.99 ± 1.68       | 0.54 |
| Total cholesterol (mmol/L)    | 5.44 ± 2.49      | 5.32 ± 1.81       | 0.81 |
| Total Kt/v                    | 2.46 ± 0.62      | 2.53 ± 0.75       | 0.33 |

Data expressed as mean ± SD.

<sup>a</sup> Median (interquartile range)

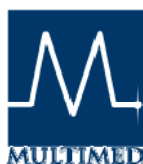

Abbreviations: HbA1c, glycated hemoglobin; GSP, glycated serum proteins; BMI, body mass index; CVD, cardiovascular disease; EPO, erythropoietin; HsCRP, hypersensitive C reaction protein.

Conversion factors for units: glucose in mmol/L to mg/dL,  $\times 18.149$ ; phosphorus in mmol/L to mg/dL,  $\times 3.097$ ; triglycerides in mmol/L to mg/dL,  $\times 88.496$ ; total cholesterol in mmol/L to mg/dL,  $\times 3.861$

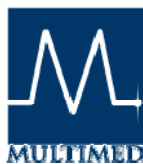

Supplemental Table 2. Baseline characteristics of patients stratified by HbA1c categories

| Variable                    | HbA1c≤5.9%    | 6.0≤HbA1c≤6.9% | 7.0%≤HbA1c≤7.9% | HbA1c≥8%     | P Value |
|-----------------------------|---------------|----------------|-----------------|--------------|---------|
|                             | (n=61)        | (n=59)         | (n=48)          | (n=32)       |         |
| Age, years                  | 60.1 ± 9.8    | 58.7 ± 12.2    | 61.9±10.2       | 60.9 ± 9.6   | 0.47    |
| Male gender                 | 38 (62%)      | 38 (64%)       | 24 (50%)        | 19 (59%)     | 0.46    |
| Follow-up duration, months  | 27.67 ± 14.24 | 30.17 ± 15.98  | 29.61 ± 13.89   | 28.61± 13.92 | 0.82    |
| BMI(kg/m <sup>2</sup> )     | 22.43 ± 2.86  | 22.97 ± 3.12   | 22.04 ± 2.98    | 22.60 ± 1.96 | 0.41    |
| CVD                         | 20 (33%)      | 23 (39%)       | 22 (46%)        | 16 (50%)     | 0.34    |
| Hypertension                | 44 (72%)      | 49 (83%)       | 41 (85%)        | 19 (59%)     | 0.03    |
| Methods of glycemic control |               |                |                 |              | 0.65    |
| Insulin                     | 55(90%)       | 54 (91%)       | 42 (88%)        | 30(94%)      |         |
| Oral hypoglycemic agent     | 2 (3%)        | 1 (2%)         | 0 (0%)          | 0 (0%)       |         |
| Combined                    | 4 (7%)        | 4 (7%)         | 6 (13%)         | 2 (6 %)      |         |

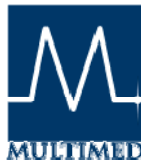

|                                 |                      |                     |                      |                      |        |
|---------------------------------|----------------------|---------------------|----------------------|----------------------|--------|
| Usage of EPO, n, %              | 57 (93%)             | 57 (97%)            | 48(96%)              | 31 (97%)             | 0.82   |
| Hemoglobin (g/L)                | 97.5 ± 15.4          | 101.1 ± 12.3        | 102.8 ± 13.3         | 104.7 ± 12.2         | 0.07   |
| Glucose (mmol/L)                | 6.20 ± 1.65          | 6.66 ± 1.77         | 8.68 ± 2.29          | 9.29 ± 2.53          | <0.001 |
| HbA1c(%)                        | 5.4 ± 0.4            | 6.4 ± 0.3           | 7.3 ± 0.3            | 9.1 ± 1.0            | <0.001 |
| GSP(μmol/L)                     | 177 ± 60             | 182 ± 52            | 221 ± 61             | 258 ± 85             | <0.001 |
| Alb-GSP((μmol/g)                | 5.09 ± 1.67          | 5.21 ± 1.37         | 6.25 ± 1.68          | 7.43 ± 2.46          | <0.001 |
| Albumin (g/L)                   | 34.7 ± 3.9           | 34.8± 3.3           | 35.3 ± 3.7           | 34.9 ± 2.8           | 0.82   |
| Phosphorus<br>(mmol/L)          | 1.57 ± 0.38          | 1.57 ± 0.32         | 1.54 ± 0.31          | 1.78 ± 1.62          | 0.44   |
| HsCRP <sup>a</sup> (mg/L)       | 5.33<br>(2.16-10.23) | 3.64<br>(1.82-7.40) | 6.27<br>(2.59-10.40) | 6.15<br>(3.12-11.17) | 0.26   |
| Total triglycerides<br>(mmol/L) | 2.10 ± 1.46          | 1.89 ± 0.85         | 2.21 ± 1.31          | 2.70 ± 2.06          | 0.07   |
| Total cholesterol<br>(mmol/L)   | 5.73 ± 4.08          | 5.20 ± 1.31         | 5.35 ± 1.26          | 5.46 ± 1.23          | 0.70   |
| Total Kt/v                      | 2.31 ± 0.47          | 2.55 ± 0.56         | 2.50 ± 0.82          | 2.51 ± 0.58          | 0.19   |

---

Data expressed as mean ± SD.

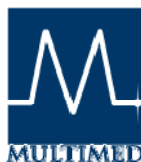

<sup>a</sup> Median (interquartile range)

Abbreviations: HbA1c, glycated hemoglobin; GSP, glycated serum proteins; BMI, body mass index; CVD, cardiovascular disease; EPO, erythropoietin; HsCRP, hypersensitive C reaction protein.

Conversion factors for units: glucose in mmol/L to mg/dL,  $\times 18.149$ ; phosphorus in mmol/L to mg/dL,  $\times 3.097$ ; triglycerides in mmol/L to mg/dL,  $\times 88.496$ ; total cholesterol in mmol/L to mg/dL,  $\times 3.861$

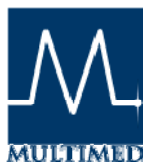

Supplemental Table 3. Baseline characteristics of patients stratified by GSP categories

| Variable                        | GSP≤145        | 146≤GSP ≤190       | 191≤GSP ≤235    | GSP ≥236           | P Value |
|---------------------------------|----------------|--------------------|-----------------|--------------------|---------|
|                                 | (μmol/L)(n=47) | (μmol/L)<br>(n=51) | (μmol/L) (n=53) | (μmol/L)<br>(n=49) |         |
| Age, years                      | 58.9 ± 11.2    | 59.3 ± 11.9        | 61.1± 9.2       | 61.2±10.1          | 0.60    |
| Male gender                     | 23 (61%)       | 35 (63%)           | 33(64%)         | 28 (52%)           | 0.60    |
| Follow-up duration,<br>months   | 24.54 ± 12.84  | 29.38 ± 16.23      | 31.54 ± 13.50   | 28.99±14.57        | 0.82    |
| BMI(kg/m <sup>2</sup> )         | 22.57 ± 2.78   | 22.71± 2.81        | 22.65 ± 3.21    | 22.17 ± 2.60       | 0.75    |
| CVD                             | 13 (34%)       | 24 (43%)           | 19(37%)         | 25 (36 %)          | 0.61    |
| Hypertension                    | 26 (68%)       | 42 (75%)           | 44 (85%)        | 41 (76%)           | 0.34    |
| Methods of glyceimic<br>control |                |                    |                 |                    | 0.59    |
| Insulin                         | 34(90%)        | 48 (86%)           | 49 (94 %)       | 50(93%)            |         |
| Oral hypoglycemic<br>agent      | 1 (3%)         | 2 (4%)             | 0 (0%)          | 0 (0%)             |         |
| Combined                        | 3(8%)          | 6(11%)             | 3 (6%)          | 4 (7%)             |         |
| Usage of EPO, n, %              | 35 (92.1%)     | 55 (98.2%)         | 48(92.1%)       | 53(98.1%)          | 0.82    |
| Hemoglobin (g/L)                | 96.7 ± 12.6    | 100.9 ± 15.7       | 102.9 ± 12.6    | 102.1 ± 13.0       | 0.17    |
| Glucose (mmol/L)                | 6.79 ± 1.82    | 6.81 ± 1.34        | 7.34 ± 2.29     | 8.59 ± 2.97        | <0.001  |



|                                 |                       |                      |                     |                     |        |
|---------------------------------|-----------------------|----------------------|---------------------|---------------------|--------|
| HbA1c(%)                        | 6.1 ± 1.1             | 6.6 ± 1.1            | 6.8 ± 1.2           | 7.4 ± 1.5           | <0.001 |
| GSP(μmol/L)                     | 119 ± 22              | 167 ± 13             | 208 ± 12            | 290 ± 66            | <0.001 |
| Alb-GSP(μmol/g)                 | 3.70 ± 0.71           | 4.88 ± 0.57          | 5.80 ± 0.53         | 8.14 ± 1.87         | <0.001 |
| Albumin (g/L)                   | 33.2 ± 3.5            | 34.6 ± 3.2           | 36.1 ± 2.8          | 36.0 ± 3.5          | <0.001 |
| Phosphorus<br>(mmol/L)          | 1.46 ± 0.26           | 1.72 ± 1.25          | 1.67 ± 0.32         | 1.50 ± 0.32         | 0.20   |
| HsCRP <sup>a</sup> (mg/L)       | 4.65<br>(1.35 -11.01) | 6.20<br>(1.87-10.63) | 4.69<br>(2.29-9.15) | 5.40<br>(2.72-8.75) | 0.85   |
| Total triglycerides<br>(mmol/L) | 2.04 ± 1.58           | 2.20 ± 1.37          | 2.16 ± 1.58         | 2.20 ± 1.17         | 0.94   |
| Total cholesterol<br>(mmol/L)   | 5.84 ± 5.01           | 5.17 ± 1.22          | 5.57 ± 1.74         | 5.31 ± 1.00         | 0.58   |
| Total Kt/v                      | 2.31 ± 0.47           | 2.55 ± 0.56          | 2.50 ± 0.82         | 2.51 ± 0.58         | 0.24   |

---

Data expressed as mean ± SD.

<sup>a</sup> Median (interquartile range)

Abbreviations: HbA1c, glycated hemoglobin; GSP, glycated serum proteins; BMI, body mass index; CVD, cardiovascular disease; EPO, erythropoietin; HsCRP, hypersensitive C reaction protein.

Conversion factors for units: glucose in mmol/L to mg/dL, ×18.149; phosphorus in mmol/L to mg/dL, ×3.097; triglycerides in mmol/L to mg/dL, ×88.496; total cholesterol in mmol/L to mg/dL, ×3.861





Supplemental Table 4. Baseline characteristics of patients stratified by Alb-GSP categories

| Variable                    | Alb-GSP $\leq$ 4.50 $\mu$ mol/g<br>n=48 | 4.51 $\leq$ Alb-GSP $\leq$ 5.50 $\mu$ mol/g<br>n=56 | 5.51 $\leq$ Alb-GSP $\leq$ 6.50 $\mu$ mol/g<br>n=44 | Alb-GSP $\geq$ 6.51 $\mu$ mol/g<br>n=52 | P Value |
|-----------------------------|-----------------------------------------|-----------------------------------------------------|-----------------------------------------------------|-----------------------------------------|---------|
| Age, years                  | 58.9 $\pm$ 10.8                         | 59.9 $\pm$ 11.9                                     | 60.5 $\pm$ 9.8                                      | 61.7 $\pm$ 9.8                          | 0.60    |
| Male gender                 | 30 (63%)                                | 35 (63%)                                            | 27(61%)                                             | 27 (52%)                                | 0.64    |
| Follow-up duration, months  | 27.47 $\pm$ 15.49                       | 30.03 $\pm$ 14.37                                   | 27.28 $\pm$ 14.40                                   | 30.72 $\pm$ 14.19                       | 0.82    |
| BMI(kg/m <sup>2</sup> )     | 22.74 $\pm$ 2.64                        | 23.21 $\pm$ 3.17                                    | 22.02 $\pm$ 2.81                                    | 22.52 $\pm$ 2.85                        | 0.09    |
| CVD                         | 21(44%)                                 | 21 (38%)                                            | 17(39%)                                             | 22 (32%)                                | 0.91    |
| Hypertension                | 34(71%)                                 | 43 (77%)                                            | 37(84%)                                             | 39 (75%)                                | 0.34    |
| Methods of glycemic control |                                         |                                                     |                                                     |                                         | 0.17    |
| Insulin                     | 43(90%)                                 | 47 (84%)                                            | 43 (98%)                                            | 48(92%)                                 |         |
| Oral hypoglycemic agent     | 2 (4%)                                  | 2 (2%)                                              | 0 (0%)                                              | 0 (0%)                                  |         |
| Combined                    | 3(6%)                                   | 8(14%)                                              | 1 (2%)                                              | 4 (8%)                                  |         |



|                                 |                       |                      |                     |                     |       |
|---------------------------------|-----------------------|----------------------|---------------------|---------------------|-------|
| Usage of EPO, n, %              | 45 (94%)              | 54 (96%)             | 41(93%)             | 51(98%)             | 0.61  |
| Hemoglobin (g/L)                | 99.13 ± 12.7          | 101.6 ± 15.0         | 100.4 ± 13.8        | 102.4 ± 13.1        | 0.65  |
| Glucose (mmol/L)                | 6.70 ± 2.00           | 6.80 ± 1.63          | 7.52 ± 1.99         | 8.70 ± 3.02         | <0.00 |
| HbA1c(%)                        | 6.3 ± 1.1             | 6.6 ± 1.2            | 6.9 ± 1.05          | 7.5 ± 1.5           | <0.00 |
| GSP(μmol/L)                     | 128 ± 27              | 177± 22              | 211 ± 23            | 289 ± 59            | <0.00 |
| Alb-GSP((μmol/g)                | 3.76 ± 0.61           | 5.05 ± 0.29          | 5.96 ± 0.31         | 8.28 ± 1.81         | <0.00 |
| Albumin (g/L)                   | 34.0 ± 3.6            | 35.1 ± 3.5           | 35.4 ± 3.6          | 35.1 ± 3.2          | 0.21  |
| Phosphorus (mmol/L)             | 1.56 ± 0.35           | 1.71 ± 1.24          | 1.64 ± 0.36         | 1.47 ± 0.28         | 0.35  |
| HsCRP <sup>a</sup> (mg/L)       | 6.68<br>(2.27 -10.81) | 5.08<br>(2.05-10.01) | 5.25<br>(2.69-9.32) | 5.31<br>(2.17-5.31) | 0.65  |
| Total triglycerides<br>(mmol/L) | 2.21 ± 1.57           | 2.13 ± 1.18          | 2.21 ± 1.78         | 2.12± 1.15          | 0.98  |
| Total cholesterol<br>(mmol/L)   | 5.81 ± 4.54           | 5.20 ± 0.86          | 5.63 ± 1.87         | 5.20 ± 1.06         | 0.52  |
| Total Kt/v                      | 2.40 ± 0.53           | 2.42 ± 0.62          | 2.40 ± 0.55         | 2.60 ± 0.72         | 0.27  |

---

Data expressed as mean ± SD.

<sup>a</sup> Median (interquartile range)



Conversion factors for units: glucose in mmol/L to mg/dL,  $\times 18.149$ ; phosphorus in mmol/L to mg/dL,  $\times 3.097$ ; triglycerides in mmol/L to mg/dL,  $\times 88.496$ ; total cholesterol in mmol/L to mg/dL,  $\times 3.861$

Abbreviations: HbA1c, glycated hemoglobin; GSP, glycated serum proteins; BMI, body mass index; CVD, cardiovascular disease; EPO, erythropoietin; HsCRP, hypersensitive C reaction protein.



Corresponding Author:

Fengxian Huang, Department of Nephrology, The First Affiliated Hospital, Sun Yat-sen University, 58th Zhongshan Road II, Guangzhou 510080, PR China.

Tel: +8620 87766335; Fax: +86 20 87769673; Email: hfxyl@163.net



Supplement: supp_2014.00011_Supplemental_Materials.pdf [file supp_2014.00011_Supplemental_Materials.pdf]
